# Supplementary material for: Toosendanin Exerts an Anti-Cancer Effect in Glioblastoma by Inducing Estrogen Receptor β- and p53-Mediated Apoptosis
Source: Int J Mol Sci. 2016 Nov 18;17(11):1928. doi: 10.3390/ijms17111928 (PMC5133924; doi:10.3390/ijms17111928)
Supplement: Supplementary file 1 [file ijms-17-01928-s001.pdf]

# Supplementary Material: Toosendanin Exerts an Anti-Cancer Effect in Glioblastoma by Inducing Estrogen Receptor $\beta$ - and p53-Mediated Apoptosis

Liang Cao, Dingding Qu, Huan Wang, Sha Zhang, Chenming Jia, Zixuan Shi, Zongren Wang, Jian Zhang and Jing Ma

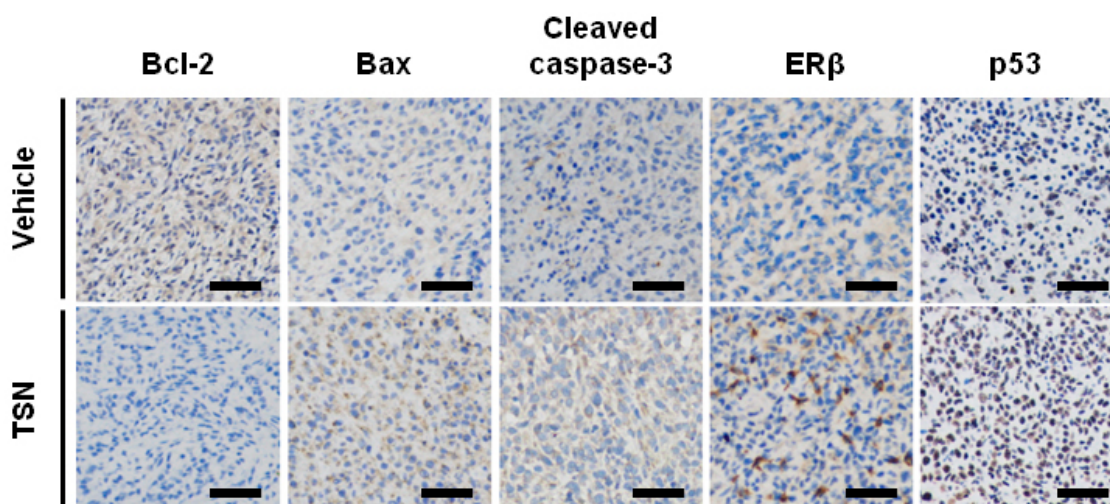

**Figure S1.** Effect of TSN (toosendanin) on U87 cells apoptosis and ER $\beta$  (estrogen receptor  $\beta$ ) and p53 induction in vivo. The U87 xenograft tumors were fixed in 4% formalin, cut into 5  $\mu$ m slides, and evaluated for Bcl-2, Bax, cleaved caspase-3, ER $\beta$ , and p53 protein expression by immunohistochemistry (Scale bar = 100  $\mu$ m).

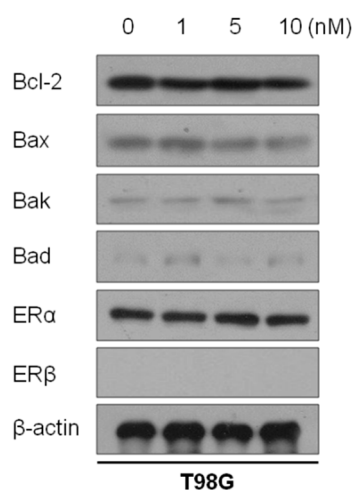

**Figure S2.** Western blot analysis of apoptosis related proteins and ERs proteins expression in TSN-treated T98G cells.

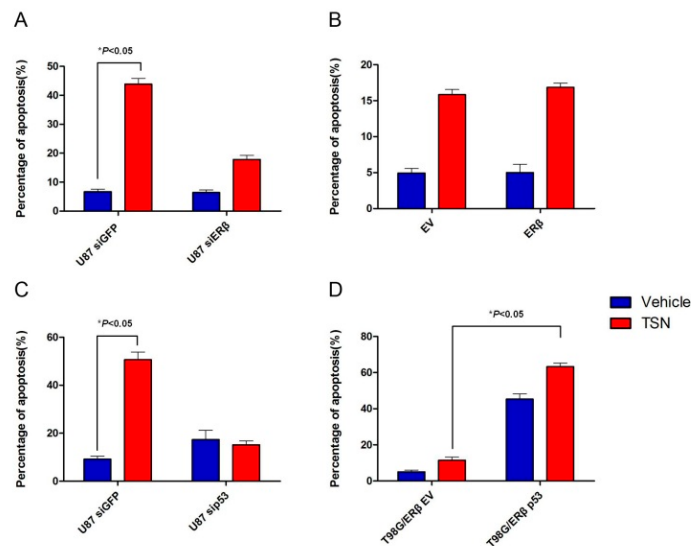

**Figure S3.** Flow chart of apoptosis related to Figure 4C (A), Figure 4E (B), Figure 5B (C) and Figure 5D (D).

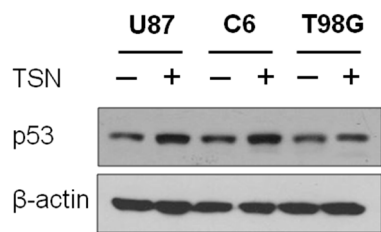

**Figure S4.** Effect of TSN on p53 expression. U87, C6, and T98G GBM cells were treated with 10 nM TSN for 48 h and examined for p53 protein level.

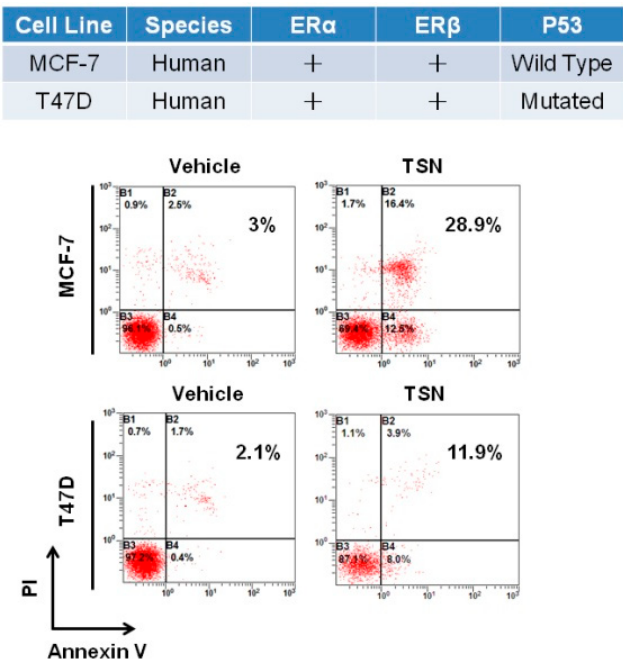

**Figure S5.** Effect of TSN on apoptosis in breast cancer MCF-7 and T47D cells. MCF-7 and T47D cells were treated with 10 nM TSN. Representative flow cytometry images were shown.

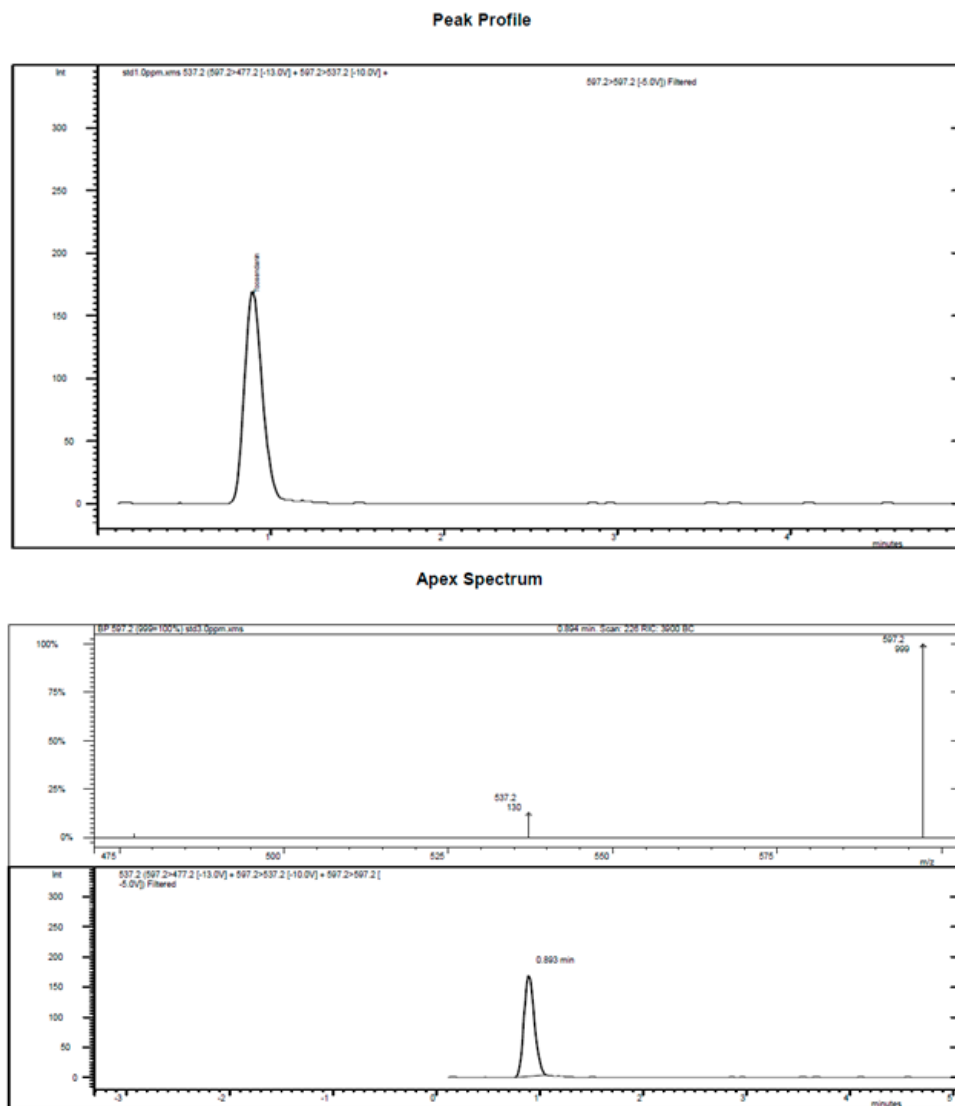

**Figure S6.** Chromatograms analysis of TSN purity.
